# Supplementary material for: The Role and Mechanism of Transglutaminase 2 in Regulating Hippocampal Neurogenesis after Traumatic Brain Injury
Source: MDPI journal article supplement (doi:10.3390/cells12040558), 2023-02-09
Supplement: s1 [file s1]

## Supplemental information

### Supplemental figures

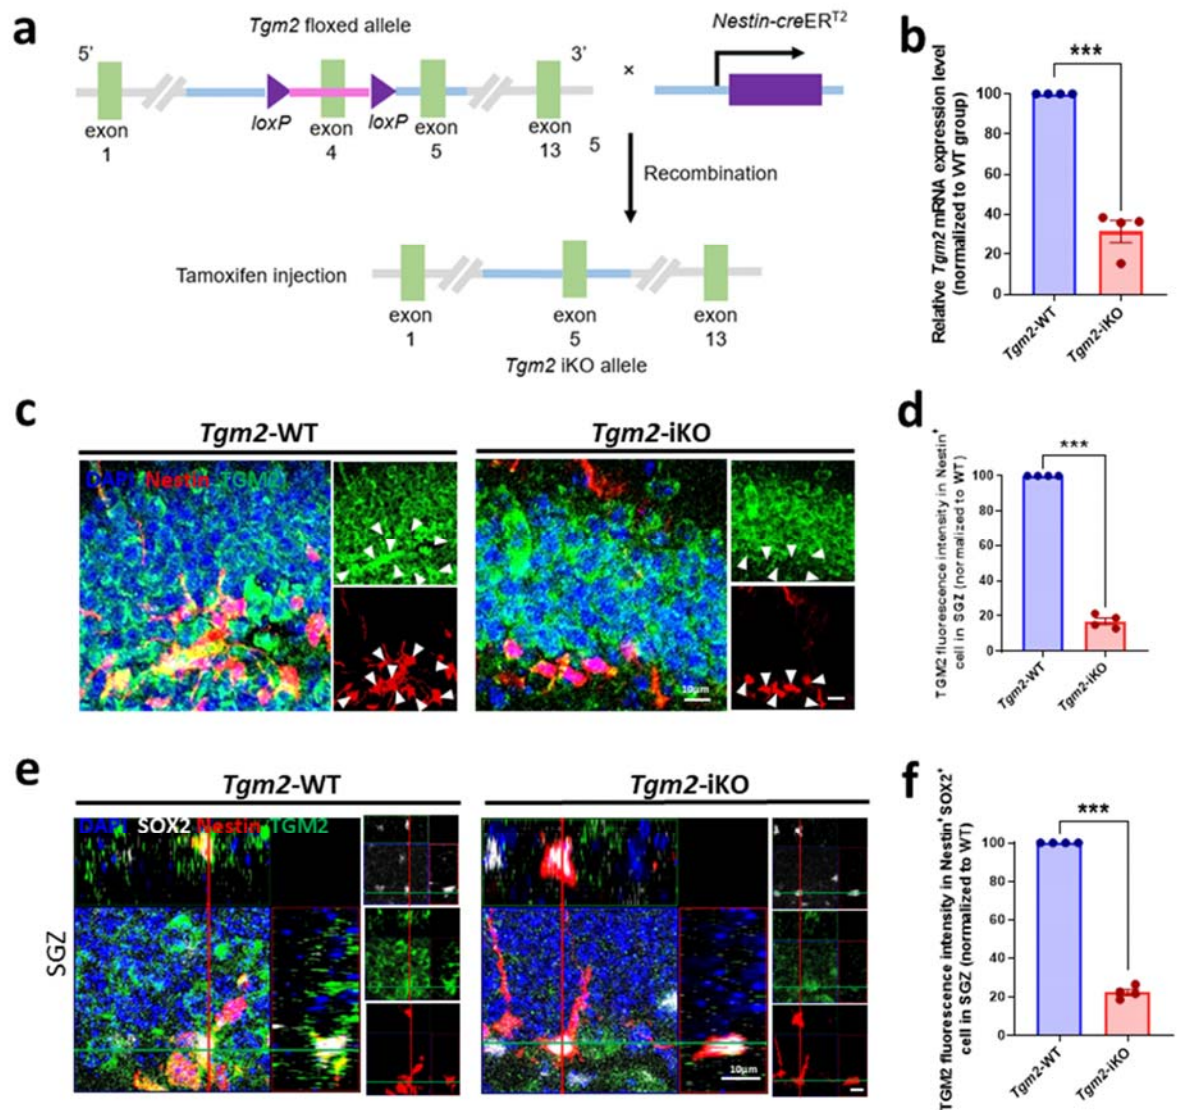

**Figure S1** Tamoxifen-induced conditional knockout of *Tgm2* in hippocampal NSPCs. **(a)** Schematic diagram for the generation of NSPCs-specific tamoxifen-inducible *Tgm2* knockout (iKO) mice. **(b)** *Tgm2* mRNA expression levels in the dentate gyrus of *Tgm2* iKO and WT littermates by real-time qPCR. **(c-d)** Representative images **(c)** and quantification **(d)** of TGM2 immunostaining in NSPCs (Nestin<sup>+</sup>) in the dentate gyrus of *Tgm2* iKO and WT littermates. Arrowheads indicate Nestin<sup>+</sup> NSPCs. **(e-f)** Three-dimensional images **(e)** and quantification **(f)** of TGM2 immunostaining in

NSPCs (Nestin<sup>+</sup>Sox2<sup>+</sup>) of *Tgm2* iKO and WT littermates. Scale bars: 10  $\mu$ m.  $n = 4$  mice per group. Data are shown as means  $\pm$  SEM; two-tailed *t*-test, \*\*\* $p < 0.001$ .

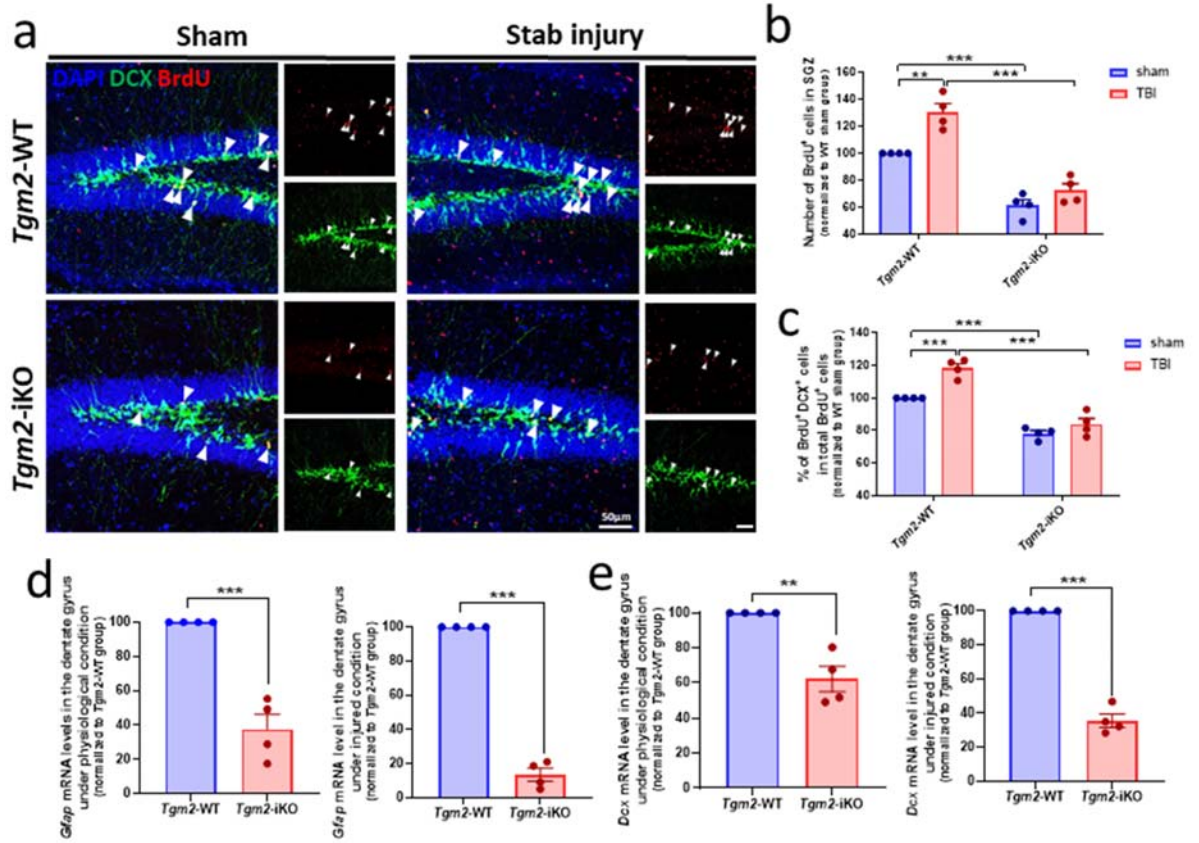

**Figure S2** TGM2 is required for hippocampal neurogenesis. **(a)** Representative images of BrdU and DCX immunostainings of dentate gyrus of *Tgm2*-WT and iKO mice at 14 days after TBI and BrdU injection. Scale bars: 50  $\mu$ m. **b-c** Quantification of the amounts of BrdU<sup>+</sup> cells (**b**) and BrdU<sup>+</sup>DCX<sup>+</sup> cells (**c**) ( $n=4$ ). **d-e** The relative expression levels of *Gfap* (**d**) and *Dcx* (**e**) mRNA in the dentate gyrus of *Tgm2* iKO mice under both physiological and injured conditions compared to that of WT littermates by qRT-PCR. Data are represented as means  $\pm$  SEM; \* $p < 0.05$ , \*\* $p < 0.01$ , \*\*\* $p < 0.001$ .

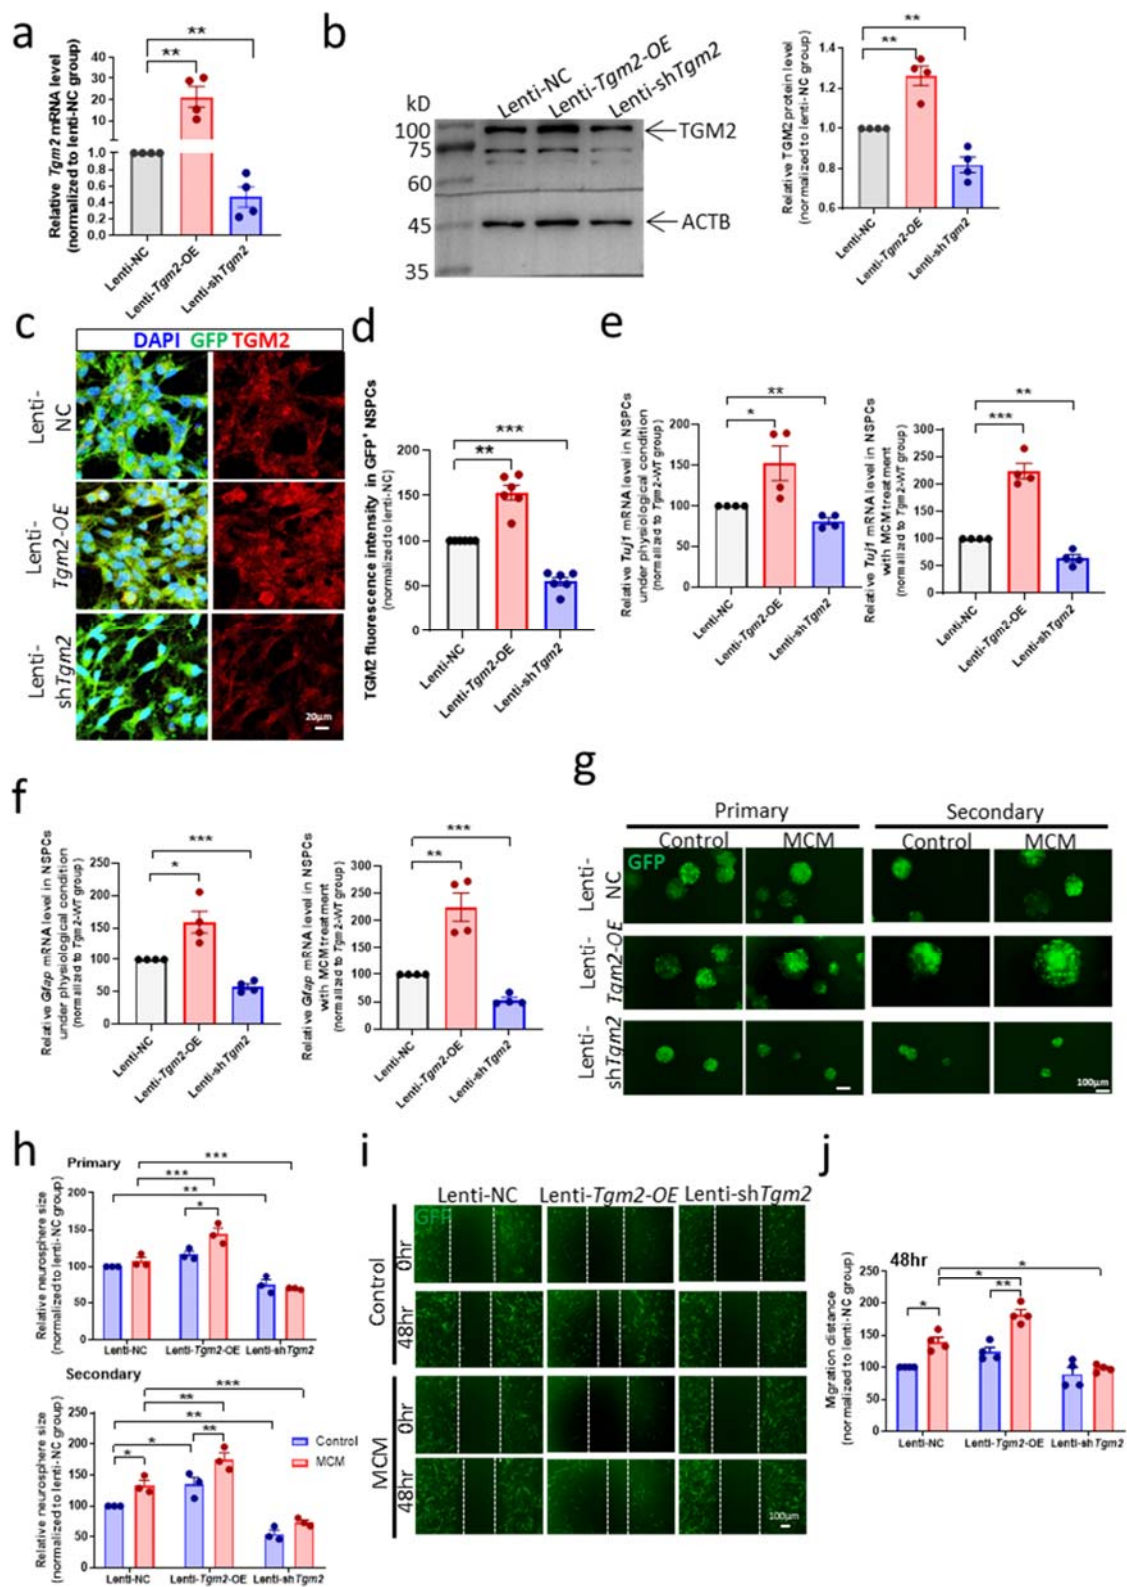

**Figure S3** TGM2 promotes self-renewal and migration of NSPCs. **(a-b)** *Tgm2* mRNA **(a)** and protein **(b)** expression levels in cultured NSPCs which were transduced with lenti-NC, lenti-*Tgm2*-OE or lenti-sh*Tgm2* virus for 72h. **c-d** Representative images **(c)** and quantification **(d)** of TGM2 immunostaining in cultured NSPCs which were transduced with lenti-NC, lenti-*Tgm2*-OE or lenti-sh*Tgm2* for 72h. Scale bars: 20  $\mu$ m. **e-f** The mRNA expression levels of *Tuj1* **(e)** and *Gfap* **(f)** in cultured NSPCs which were transduced with lenti-NC, lenti-*Tgm2*-OE or lenti-sh*Tgm2* for 72h.  $n = 4$  cultures. **g-h** Representative images **(g)** and quantification **(h)** of the sizes of primary, secondary, and tertiary neurospheres formed 4 days after initial plating of NSPCs which were transduced with lenti-NC, lenti-*Tgm2*-OE or lenti-sh*Tgm2*. Scale bars: 100  $\mu$ m. **i-j** Representative images **(i)** and quantification **(j)** of the migration of NSPCs in cell scratch experiment. Scale bars: 100  $\mu$ m.  $n = 4$  cultures. Data are represented as means  $\pm$  SEM; two-way ANOVA, \* $p < 0.05$ , \*\* $p < 0.01$ , \*\*\* $p < 0.001$ .

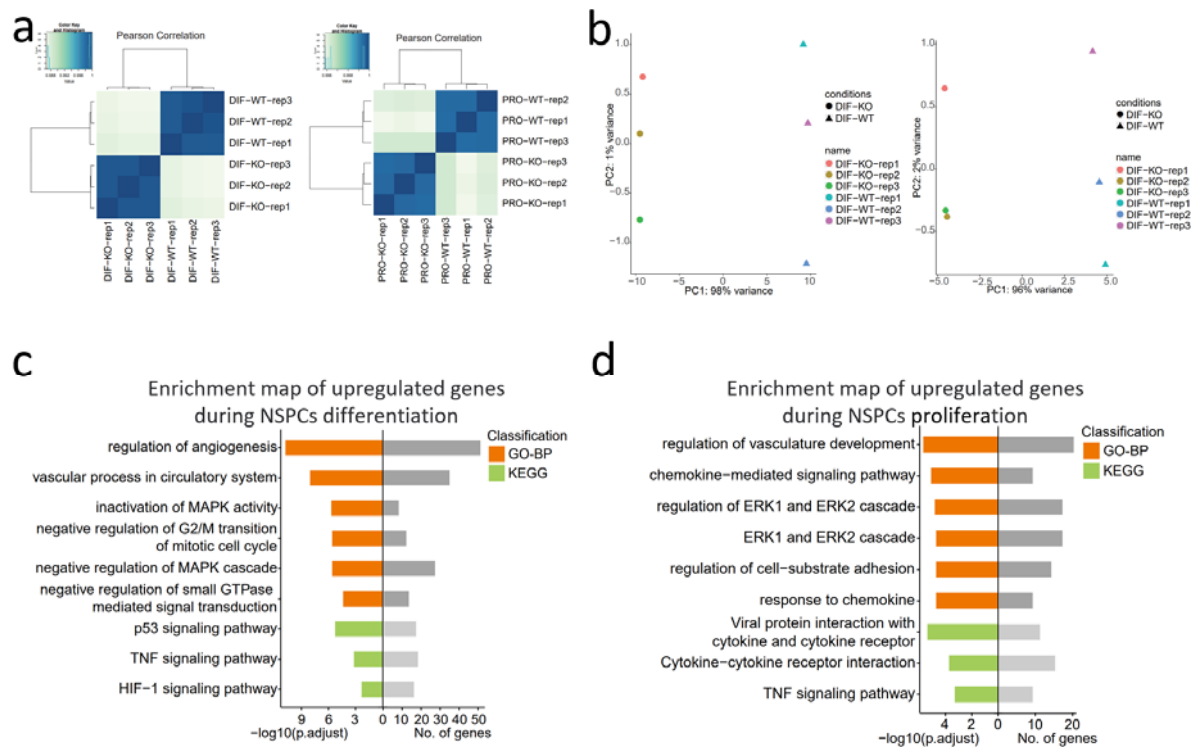

**Figure S4** *Tgm2*-deletion resulted in transcriptional changes in NSPCs. **(a)** The Pearson correlations depicting the correlation coefficients of RNA-seq samples. **b** Principal component analysis (PCA) showing the variations in NSPCs transcriptomes between *Tgm2* WT and iKO groups. **c** Bar plot depicting the significantly enriched GO terms (biological processes, BP) and KEGG pathways of upregulated genes during neural differentiation of TGM2-null NSPCs. **d** Bar plot depicting the significantly enriched GO terms (biological processes, BP) and KEGG pathways of upregulated genes during proliferation of TGM2-null NSPCs.



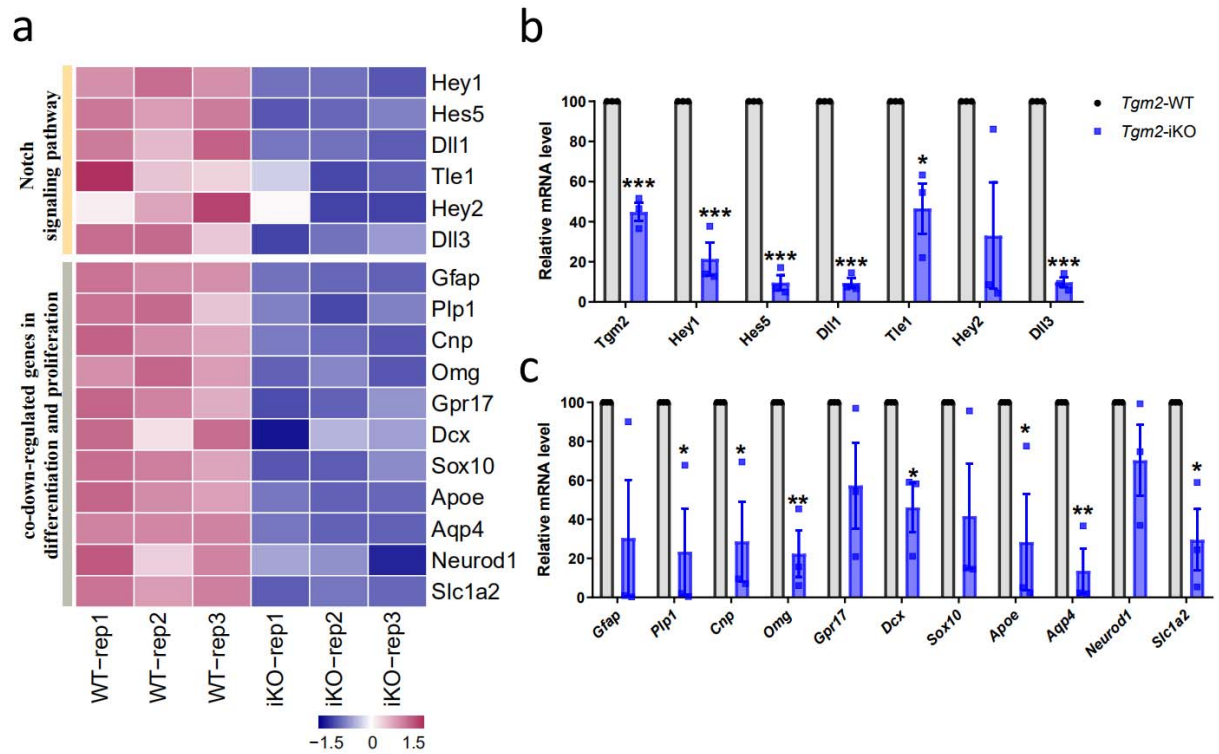

**Figure S5** Deletion of *Tgm2* dysregulates the expression of genes associated with NSPCs proliferation and differentiation. **(a)** Heat map diagrams of co-downregulated genes in processes of proliferation and differentiation as well as differentially expressed Notch-signaling-pathway genes between *Tgm2* WT and iKO NSPCs in the proliferation process. **b,c** Quantitative PCR analysis verified that almost all of previously identified Notch-signaling-pathway genes **(b)** and co-downregulated genes in processes of proliferation and differentiation **(c)** were significantly downregulated in a new culture of *Tgm2* iKO NSPCs under proliferating conditions.  $n = 3$  cultures. Data are shown as means  $\pm$  SEM; two-tailed  $t$ -test, \* $p < 0.05$ , \*\* $p < 0.01$ , \*\*\* $p < 0.001$ .
